# Supplementary material for: Resting-state functional reorganisation in Alzheimer’s disease and amnestic mild cognitive impairment: protocol for a systematic review and meta-analysis
Source: HighWire-hosted journal article supplement (doi:10.1136/bmjopen-2021-049798), 2021-10-01
Supplement: bmjopen-2021-049798supp001_data_supplement.pdf [file bmjopen-2021-049798supp001_data_supplement.pdf]

## Supplementary File 1. Search strategies.

### Search strategy for Medline-PubMed:

- #1 (alzheimer\*[Title/Abstract]) OR (alzheimer disease[MeSH Terms])
- #2 (dementia[MeSH Terms]) OR (dement\*[Title/Abstract])
- #3 (((((MCI[Title/Abstract]) OR ("mild cognitive impairment"[Title/Abstract])) OR ("amnesic mild cognitive impairment"[Title/Abstract])) OR (aMCI[Title/Abstract])) OR (SCD[Title/Abstract])) OR ("subjective cognitive decline"[Title/Abstract])
- #4 (cognit\*[Title/Abstract]) OR (memor\*[Title/Abstract])
- #5 ((impair\*[Title/Abstract]) OR (decline[Title/Abstract])) OR (reduc\*[Title/Abstract])
- #6 #4 and #5
- #7 (((((((("functional magnetic resonance imaging"[Title/Abstract]) OR ("magnetic resonance imaging"[Title/Abstract])) OR ("resting-state functional magnetic resonance imaging"[Title/Abstract])) OR ("resting state functional magnetic resonance imaging"[Title/Abstract])) OR (fMRI[Title/Abstract])) OR ("functional MRI"[Title/Abstract])) OR (MRI[Title/Abstract])) OR ("rs-fMRI"[Title/Abstract]))
- #8 (((("amplitude of low frequency fluctuation\*" [Title/Abstract]) OR ("fractional amplitude of low frequency fluctuation\*" [Title/Abstract])) OR ("regional homogeneity\*" [Title/Abstract])) OR (ReHo\*[Title/Abstract])) OR (ALFF\*[Title/Abstract])) OR (fALFF\*[Title/Abstract]))
- #9 #1 or #2 or #3 or #6
- #10 #7 and #8 and #9

### Search strategy for Medline-Ovid and EMBase-Ovid:

- #1 exp alzheimer disease/ or dementia/
- #2 (alzheimer\* or dement\*).tw.
- #3 (MCI or "mild cognitive impairment" or "amnesic mild cognitive impairment" or aMCI or SCD or "subjective cognitive decline").tw.
- #4 (cognit\* or memor\*).tw.
- #5 (impair\* or decline or reduc\*).tw.
- #6 #4 and #5
- #7 ("functional magnetic resonance imaging" or "magnetic resonance imaging" or "resting-state functional magnetic resonance imaging" or "resting state functional magnetic resonance imaging" or fMRI or "functional MRI" or MRI or "rs-fMRI").tw.
- #8 ("amplitude of low frequency fluctuation" or "fractional amplitude of low frequency fluctuation" or "regional homogeneity" or REHO\* or ALFF\* or fALFF\*).tw.
- #9 #1 or #3 or #6
- #10 #7 and #8 and #9

### Search strategy for Cochrane Central:

- #1 'Alzheimer disease':ti,ab,kw OR 'dementia':ti,ab,kw OR 'alzheimer\*':ti,ab,kw OR 'dement\*':ti,ab,kw OR 'MCI':ti,ab,kw OR 'mild cognitive impairment':ti,ab,kw OR 'amnesic mild cognitive impairment':ti,ab,kw OR 'aMCI':ti,ab,kw OR 'SCD':ti,ab,kw OR 'subjective cognitive decline'
- #2 ('cognit\*':ti,ab,kw OR 'memor\*':ti,ab,kw) AND ('impair\*':ti,ab,kw OR 'decline':ti,ab,kw OR 'reduc\*':ti,ab,kw)
- #3 'functional magnetic resonance imaging':ti,ab,kw OR 'magnetic resonance imaging':ti,ab,kw OR 'resting-state functional magnetic resonance imaging':ti,ab,kw OR 'resting state functional magnetic resonance imaging':ti,ab,kw OR 'fMRI':ti,ab,kw OR 'functional MRI':ti,ab,kw OR 'MRI':ti,ab,kw OR 'rs-fMRI':ti,ab,kw
- #4 'amplitude of low frequency fluctuation':ti,ab,kw OR 'fractional amplitude of low frequency fluctuation':ti,ab,kw OR 'regional homogeneity':ti,ab,kw OR 'REHO\*':ti,ab,kw OR 'ALFF\*':ti,ab,kw OR 'fALFF\*':ti,ab,kw
- #5 #1 OR #2
- #6 #3 AND #4 AND #5

### Search strategy for clinicaltrials.gov:

Condition or disease: Alzheimer Disease OR MCI

Study type: All Studies

Study Results: All Studies

Outcome Measure: MRI or magnetic resonance imaging
